# Supplementary material
Source: Springer Nature journal article supplement (https://www.springermedizin.de/resource/supplementary/12960_2006_54_MOESM4_ESM.pdf/9570306)

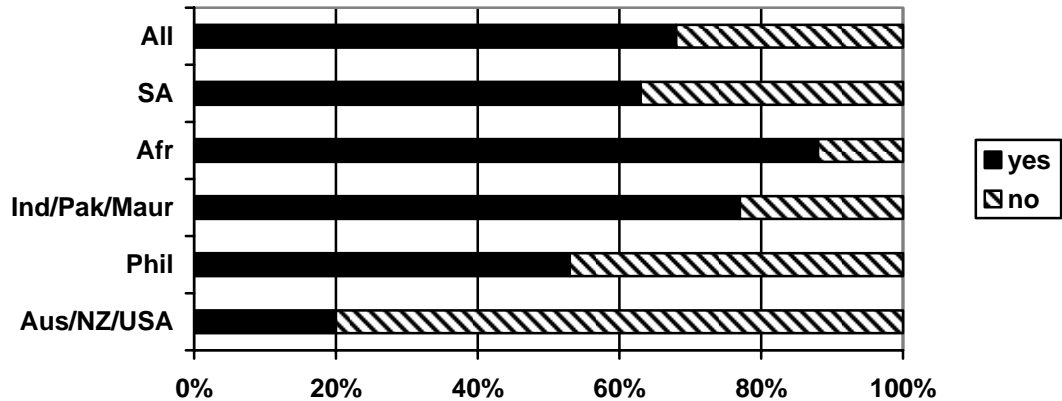

Supplement: MOESM4 [file 9570306]
